# Supplementary material
Source: PubMed Central journal article supplement (PMC3179116)
Supplement: 1109551108_pnas.201109551SI.pdf [file 1109551108_pnas.201109551SI.pdf]

# Supporting Information

Zhou et al. 10.1073/pnas.1109551108

## SI Text

**Analysis of the Evolutionary Conservation of the AS Events.** How the AS events in the genes that we studied change the function, or lower the expression level, is unknown. Indeed, the functions of AS isoforms are currently poorly characterized in plants, with only a relatively small number (probably <100 genes) with functional characterization. The vast majority of the events we assayed are intron retention (IR), which is the most common type of AS in plants, with most of those causing premature stop codons that would result in the production of truncated proteins or potentially lower the level of gene expression by being degraded by nonsense-mediated decay. Evolutionary conservation can provide some clues as to the possibility of functionality.

We analyzed conservation of the AS events between *Brassica* and *A. thaliana* using publicly available EST data. We found that 24 events, including 18 IR events, were conserved between the two species (Table S5). However, the *Arabidopsis* EST collections are not comprehensive with regards to AS and thus there could be additional conserved events. Also we analyzed AS events in duplicated genes in *Brassica*, many of which probably originated during one of the ancient whole-genome duplication events in its lineage. We found 13 additional events that are conserved between the duplicated genes, all of which are IR. An additional eight AS events (including seven IR) show differential regulation in different organ types or under stress conditions (Table S2); developmental or stress-regulation of AS events has been suggested as evidence of true AS events (1). We also evaluated AS conservation across the four total accessions of the diploids *B. rapa* and *B. oleracea* that we studied. There were 33 additional conserved events, including 30 IR events, which were not found in the other analyses described above. Thus, there are a total of 68 IR events, of 72 that were assayed, that show evolutionary conservation, or developmental or stress regulation.

## SI Materials and Methods

**Plant Materials and Nucleic Acid Extractions.** Plants included *B. napus* (canola cultivar Sentry summer rape; a gift of Peter McVetty, University of Manitoba, Winnipeg, MB, Canada) (2), *B. rapa* (Chinese cabbage cultivar MU525B; West Coast Seeds), and *B. oleracea* (cauliflower cultivar Semences; Rennies). Plants were grown from seed in growth chambers at  $20 \pm 0.5$  °C under a 16-h day length (3) with 50% humidity for 2 wk (4). Plants were rotated to minimize edge effects. After 2 wk and 1 d, two different organ types, leaf and cotyledon, were collected from plants, frozen in liquid nitrogen, and stored in  $-80$  °C until RNA extraction. As biological replicates, two sets of tissue from different plants were collected. Several plants were used per replicate. For the cold treatment on 2-wk-old seedlings, 20 °C was ramped to 4 °C so as not to induce cold shock, and the plants were then maintained at 4 °C for 24 h (5). For the heat treatment on the 2-wk-old seedlings, 20 °C was ramped to 38 °C and then maintained at 38 °C for 24 h (6). After the heat and cold treatments, the cotyledons and leaves were collected, frozen in liquid nitrogen, and stored at  $-80$  °C. Stressed plants were collected on the same day as the nonstressed plants. All of the tissues were collected at about the same time of day to minimize circadian effects among samples.

Seeds of the resynthesized *B. napus* lines and their diploid parents were obtained from the Arabidopsis Biological Resource Center (ABRC accession nos. CS29001, CS29002, CS29003, and CS29008). The diploid parents were mostly or completely homozygous because they were created by self-pollination for five and eight generations in *B. oleracea* and *B. rapa*, respectively, followed by microspore culture to produce a doubled-haploid stock (7). The synthetic allotetraploid was created by Lukens et al.

(6) by crossing doubled-haploid *B. rapa* (IMB218A) and *B. oleracea* (TO1000C) followed by spontaneous chromosome doubling or colchicine doubling. The lines were propagated to the fifth generation by single-seed descent (8). The resynthesized allopolyploids and their diploid parental lines were grown under the same conditions as the natural *B. napus*. Two organ types, cotyledons and leaves, were collected after 2 wk and 1 d at about the same time of day as the natural polyploids.

The cetyltrimethylammonium bromide (CTAB) method was used to extract total genomic DNA from young leaves (9). RNA was extracted using the method described by Chan et al. (10). The quantity of RNA and DNA was estimated using a spectrophotometer, and the quality of RNA was checked on 1.5% agarose gels after the DNaseI treatment. The RNA was treated with DNaseI (New England BioLabs) to remove the residual DNA.

## Gene Choice, Sequence Alignments, and Assessment of Homeologs.

Genes, putative functions, and accession numbers are listed in Table 1 and Table S1. Gene choice was done as follows: All available *B. oleracea* ESTs from the National Center for Biotechnology Information (NCBI; as of January 2009) were clustered using CD-Hit. Clusters containing multiple ESTs were retained and randomly selected for further analysis. The homologous gene from *A. thaliana* for each *B. oleracea* cluster was identified using BLAST searches. The TAIR database (<http://www.arabidopsis.org>) was used to help identify AS events in the *Brassica* ESTs. Genes with no evidence of AS in *Brassica* were discarded. Also, genes with small alternative donor or alternative acceptor events, which would be difficult to separate from completely spliced transcripts on agarose gels after RT-PCR, were discarded.

Sequence alignments and phylogenetic analysis: *B. rapa*, *B. oleracea*, and *B. napus* ESTs and genomic sequences were retrieved from NCBI by BLAST searches. Sequencher 4.9 software was used to align the ESTs/cDNA of each gene to its genomic regions and make contigs to authenticate the identified AS. By comparing ESTs of *B. napus*, *B. rapa*, and *B. oleracea*, the SNP sites in *B. napus* ESTs were identified. Phylogenetic trees were constructed to verify homeologs and other paralogs in the gene families using maximum likelihood with default parameters in Molecular Evolutionary Genetic Analysis (MEGA) 4.1 (11).

**RT-PCR Analysis of AS.** PCR primers were designed with the Primer3 analyzer tool (12). All primers were designed to amplify both homeologs from *B. napus* and the corresponding genes from *B. rapa* and *B. oleracea* (Table S3), but not paralogous genes that were created by other duplication events. By sequencing all RT-PCR products from *B. napus* and some from *B. rapa* and *B. oleracea*, the amplification of the homeologous genes, and not the paralogous genes, was confirmed.

DNaseI-treated RNA (1  $\mu$ g) was used to synthesize the first-strand cDNA. The cDNA was made from 1  $\mu$ g of total RNA in a final reaction volume of 20  $\mu$ L using oligo(dT) primers and M-MLV Reverse Transcriptase (Invitrogen) according to the manufacturer's protocol. Oligo(dT) will prime mostly on polyadenylated transcripts to assay mostly fully synthesized transcripts. To confirm the absence of genomic DNA contamination, a parallel reaction without the reverse transcriptase enzyme was performed. For PCR analysis, 1  $\mu$ L of cDNA or genomic DNA was amplified with 1 unit Paq5000 DNA polymerase (Stratagene), 1 $\times$  Paq5000 reaction buffer, 2.5 mM MgCl<sub>2</sub>, 0.25 mM of each dNTP, and 0.25  $\mu$ M of each primer in a final reaction volume

of 20  $\mu\text{L}$ . The cycling conditions were 94 °C for 4 min; 34 cycles of 94 °C for 24 s, 60 °C for 27 s, and 72 °C for 1 min with a final extension period at 72 °C for 8 min. To ensure all reagents were free of DNA contamination, a negative control with water instead of template was used. Electrophoresis runs were used to resolve the amplified fragments on agarose gels (1.5%) and stained with ethidium bromide for visualization. By confirming the presence or absence of the AS band on agarose gels, one could compare the pattern of AS in *B. oleracea*, *B. rapa*, and *B. napus*. However, sequencing was necessary to determine whether one or both homeologs showed AS in *B. napus*. Some of the assayed genes did not show AS in the organ types or conditions that were used in this study, perhaps because of the presence of AS in different organ types or growth conditions; those genes were removed from this study because they were uninformative about AS.

**Sequencing of AS Bands from the Polyploids and Homeolog-Specific Analysis of AS.** RT-PCR bands were cut and purified by GenElute Gel Extraction Kit (Sigma-Aldrich). The purified DNA was reamplified by 20 cycles of PCR and precipitated by adding 1/10th vol of 3M sodium acetate (pH 5.2) and 2.5 vol of cold absolute ethanol. The mixture was incubated at -20 °C overnight. The nucleic acids were recovered by centrifugation, and the pellets were washed with 70% (vol/vol) ethanol. Finally, the air-dried pellets were dissolved in ddH<sub>2</sub>O, and the quantities of the nucleic acids were measured with a spectrophotometer. Intron-specific

primers (Table S3) were used to sequence the alternatively spliced bands that contain whole or partial intronic regions by using Big-Dye Terminator v3.1 (Applied Biosystems) sequencing chemistry.

After trimming the low-quality bases at the end of the chromatograms, the obtained sequences were aligned to the contig that contained *B. rapa*, *B. oleracea*, and *B. napus* sequence alignments. By assessing the SNPs sites, one could infer whether one or both homeologous genes were present in the AS band. The existence of double peaks in the chromatograms at polymorphic sites represented the case of AS in both homeologs. If a single peak corresponding to either the *B. oleracea* or *B. rapa*-specific nucleotide was present in the sequence, it was scored as presence of one homeolog. Several SNPs were assayed for each gene. If only one of the homeologous genes was present in the AS band, then sequencing of the major splice form was required to determine if both homeologs were expressed. If both of the homeologous genes were present in the major RT-PCR band, then one could conclude that both homeologs are expressed, and the lack of AS in one homeolog was not due to lack of expression of that homeolog. However, if only one of the homeologous genes was present in the major band, one can conclude that homeolog silencing or loss occurred. Finally, the presence of only one of the homeologous genes in genomic DNA would indicate gene deletion or recombination.

- Reddy ASN (2007) Alternative splicing of pre-messenger RNAs in plants in the genomic era. *Annu Rev Plant Biol* 58:267–294.
- Rimmer SR, Scarth R, McVetty PBE (1998) Sentry summer rape. *Can J Plant Sci* 78: 615–616.
- Krishna P, Sacco M, Cherutti JF, Hill S (1995) Cold-induced accumulation of hsp90 transcripts in *Brassica napus*. *Plant Physiol* 107:915–923.
- Richter EK, Spangenberg JE, Kreuzer M, Leiber F (2010) Characterization of rapeseed (*Brassica napus*) oils by bulk C, O, H, and fatty acid C stable isotope analyses. *J Ag Food Chem* 58:8048–8055.
- Dalal M, Tayal D, Chinnusamy V, Bansal KC (2009) Abiotic stress and ABA-inducible group 4 LEA from *Brassica napus* plays a key role in salt and drought tolerance. *J Biotechnol* 139:137–145.
- Young LW, Wilen RW, Bonham-Smith PC (2004) High temperature stress of *Brassica napus* during flowering reduces micro- and megagametophyte fertility, induces fruit abortion, and disrupts seed production. *J Exp Bot* 55:485–495.
- Lukens LN, et al. (2006) Patterns of sequence loss and cytosine methylation within a population of newly resynthesized *Brassica napus* allopolyploids. *Plant Physiol* 140: 336–348.
- Gaeta RT, Pires JC, Iniguez-Luy F, Leon E, Osborn TC (2007) Genomic changes in resynthesized *Brassica napus* and their effect on gene expression and phenotype. *Plant Cell* 19:3403–3417.
- Doyle JJ, Doyle JL (1987) A rapid DNA isolation procedure for small quantities of fresh leaf tissue. *Phytochem Bull* 19:11–15.
- Chan K-L, Ho C-L, Namasivayam P, Napis S (2007) A simple and rapid method for RNA isolation from plant tissues with high phenolic compounds and polysaccharides. *Nature*, 10.1038/nprot.2007.184.
- Tamura K, Dudley J, Nei M, Kumar S (2007) MEGA4: Molecular Evolutionary Genetics Analysis (MEGA) software version 4.0. *Mol Biol Evol* 24:1596–1599.
- Rozen S, Skaletsky H (2000) Primer3 on the WWW for general users and for biologist programmers. *Methods Mol Biol* 132:365–386.

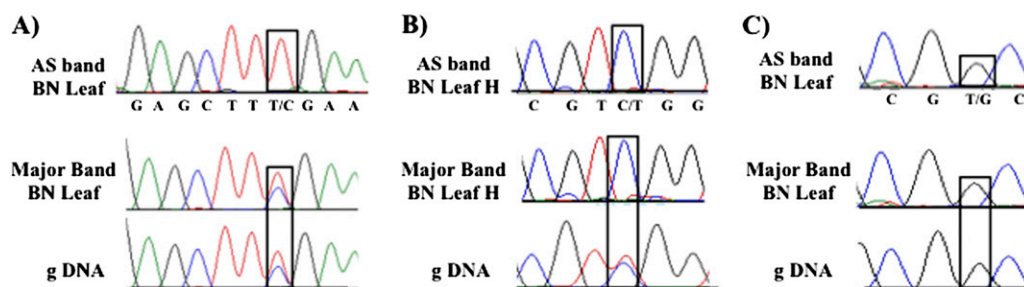

**Fig. S1.** Distinguishing among AS of only one homeolog, homeologous gene silencing, or homeologous gene loss/chromosome rearrangements cases in natural *B. napus* (BN). Chromatograms show sequencing of RT-PCR products from the AS band, major band, and PCR from genomic DNA, each containing one SNP site. Multiple SNPs were evaluated per gene. (A) Gene 17 showed only one peak at a SNP site in the AS band from leaf but two peaks in the major form band (fully spliced form) and in genomic DNA, indicating AS in only one homeolog. (B) Gene 9 showed one peak in both the AS form and major form in leaf under heat stress, but two peaks in genomic DNA, indicating silencing of one homeolog. (C) Gene 28-1 showed only one peak corresponding to one of the homeologs in the AS band, major form band, and in genomic DNA, indicating loss or rearrangement of one homeolog.











**Table S3. Primers used for PCR reactions**

| Gene no. | F primers                    | R primers                   | Intron- or exon-specific primers |
|----------|------------------------------|-----------------------------|----------------------------------|
| 1        | AAATTCTGGGTGGTGAAGCA         | AAATTCTGGGTGGTGAAGCA        | TTTTGGTCTTTACTTGAA               |
| 2        | CAACGGATCAGTCAATTTGCAG       | TAATCTCGGGAAGTAAACGGATG     | AAAGAAGACGATCCAAGTCAGA           |
| 3        | CAACTGTGAAGTTGGTGTCTTTTC     | CGATTCTGACCACAACCTTG        | TGATATTGCCACTTGC                 |
| 4        | GCTCTCGGTTACGGTTGAG          | CACTGTGCTGCTAGGAAA          | GTTGCKACTAGTTTTGTGTAGCTCT        |
| 5        | AACAGCGACGATGAAGAAGACT       | CTTCTGTGTGTCTCCCAA          | GTTCCMAATTTAGAAAAGTT             |
| 6-1      | CGGGTCTTTCTCCTTCG            | AAACAGCCTTGAACCTATCTGC      | CCAGGAAATGCAAAGAGAA              |
| 6-2      | AGATCACCTGTTTCTGCAACCT       | TCTCTACGCTGACCAAGCA         | GTAAGAAAAGGTCAAATGAGG            |
| 7        | TCAAGGGTGTGTCTCTTATG         | TGTGATGAAGCTTCTGTGTTT       | GTAAGYTTAAACACATACA              |
| 8        | CCGTGAATCTCGTCTCAT           | GGATCTTGTGTTCCAGTCC         | TTTTTTGTGTACTGCATGTGC            |
| 9        | TGCTGAGTTTACGGTTCAATATGGT    | ATCTCTCCGTTTCCAGGC          | MWGGATTGCAGAYAAGTCACA            |
| 10       | CAAGAAGATATTCGAGAAGAGTAGTGTT | TTGATCCGGGAAATTCGATAG       | TGAAGCTTGAAGACCTTTG              |
| 11       | CTAGCACCGAGAGATTGGAACAG      | GAGACACAAGCCAAGGACTTCAA     | GTATATAAAAATCTCATAATAGCTTT       |
| 12       | GCGCGTGTCTGCACTAAATA         | CGAAAGTCTCGTTCCAATGACTT     | TGTCCTGCACTAAATACTTCGAC          |
| 13       | ACTTCTCCATCGCTTCTTCTC        | TTTCTCCACAAATCTATGCACCA     | CTAATATAACATAGCCTAGG             |
| 14       | TCTTCTGTCTGTCTGATTCTACG      | GGAGATCCATGGGGTAATGTT       | TTAAGCAAGATCGCGTG                |
| 15       | AGGGAATATCTACTCGGTGAAGC      | TGCTCTTTAGCTCGGAGACC        | TGACGAAAAGTGATTGGCTTTT           |
| 16       | TGAGAAGCAGCGAAAGAGAGGA       | GCAAGTAGCGGAACAACAAGG       | CTGCCTATCGCAATTCACAC             |
| 17       | CACTCCGACAACGCCACA           | TTAACGGTGTGACTCCTTGAC       | GATAACGAAGCTCAAAGGAA             |
| 18       | TCCTCCGTTGACTATGGTCT         | GCAGCTTACGATACTTGGG         | CATCCATGGAYAGGGTTGAT             |
| 19       | CCACCACTAAGGGAGGATGA         | CATCCCTGTATTTCTTGATGCTT     | TAGCTTGTCAAGTGGCATGG             |
| 20       | CCTCACACACATGGATCG           | AACAATTTTCACTGCCACCAT       | CCCGCTATAAAAATATATAG             |
| 21       | TTCTTCGCTGCAGACGATCC         | AACATCTCAGCGTGTCTCGT        | CCGTTTGTGGAGGTGAAGAA             |
| 22       | AGAGCTCGGTTATCTCTG           | CCTCCACTCCACAGTTCAT         | CTCGACGATAATATCGCACCGA           |
| 23       | AAGTTTGGATTCATCTGGGAA        | TAATGAGAGCCTGCAAATAAAGAAAAG | GCATAAATTAACAATGGGTTGC           |
| 24       | TTACTTGTTCGCAATCTCCGG        | GGCTCTTTCTGTTCTCCTCTG       | CTGGTCAAAGTCAAGTTAGTACA          |
| 25       | AAGTTCAGCTGGTCCATCTTCGG      | GCTAAAGTTGAAGCAGCTTGAG      | CAGCCAAAGAAGAAGGGATG             |
| 26       | GGAACTACTGTCTGACTGTTGGA      | AATGTCTCGCTCATCAGCATCACGG   | TACACATCCCTCTCTTTTG              |
| 27       | ATCCCTATCGACTTCTCATCCTGA     | GAGTACCGGTCTCGTGGG          | GGATCAGAYCATCGGAAAYC             |
| 28-1     | CTTGAGCGTCTTTTTCAGCAGATACG   | CGTCATCAGCATCACGAGGAT       | —                                |
| 28-2     | CGAGATGTTGATATGAAGCGTGA      | CCATCAACGTCCCTTCCG          | —                                |
| 29       | GGCCTGTGCTATGCTTATG          | CCAAGAATAAGATCAAAGCCATC     | AAACAGAAGARACATCAATAGC           |
| 30       | TTGTGTGTGAGAAAGGCATGT        | CCAGTTATAGGACCATAGATTTTGGG  | GTAATGTTATCTGCTGATAATGATG        |
| 31       | AATGGGAATTGATCTGAAGACGT      | CTCCAATACCAGAAAAGCGAAC      | TTATAAGAGTAGCCTCTGGAGTTGA        |
| 32       | AACCCGAAGCAGCAAGCAA          | ACTGAAGGGCACATGGTC          | GTAGGAAACACAACAAC                |
| 33       | TGATCTGACGAGAGGCTTAAT        | AAGACCTCCATTGAGCTGATTC      | CAAGGTTCTAAAACACAGTCTT           |
| 34       | TCTTCGTGAAAACCTCAC           | CAAACACAATCAGAGAGCAAGAAC    | GTGTTGAACTGAGCTCTGC              |
| 35       | ACGTTCAAGCAAGCATGTGTAG       | CCTGTCTCTCTCTTAATGG         | GAGAGAGTTGGATATAACAAAC           |
| 36       | GATCGATAACGGTGATTCCG         | GACGGTTGACATCACTCGG         | CTTTATCTTAGGTTGTCGATTGAG         |
| 37       | TGCTCTTAGAACAGGCACTGA        | GCTCAAAGCAAATGCAACAGAGT     | CTGTTAACACGTATTATACC             |
| 38       | GGAGGACTCATGGGAACACTCT       | TCGGTGAGTAATGGTAAAGTG       | TCAATCAAGAACTCACTTC              |
| 39       | TGTCGGGATAAACCGGATG          | CGGAAGCAACCCACTTCTAA        | —                                |
| 40       | GAGGTTGGGATCAAATCAGTT        | CTTTTATCTTACGCCACTTCTCTT    | ACCTCACCCTAGCAAATTTTC            |
| 41       | CTCGTCTTCTCGATTCTCAG         | CATGGACAAGCCAGAAGAGAGA      | GTTATCGTTTCGTGAAATG              |
| 42       | CGGATGGGACTGTCTGACAAAG       | AGTGCGGTGACGTCTGTTATCG      | GTAAGATTCTTTAAATTCCTG            |
| 43       | GGTGGTCTTATCCAGCAGCATCT      | AGGGAGGCTAAAGGGAAGTTTGA     | ATCAATCATCCCATTATGAC             |
| 44       | TTACCCGTGCTTCGACCCTAA        | CGTACTGCTTCCACGGCA          | TATGTCAAATTCAGTTCTTTC            |
| 45-1     | GTGCTCTCCGATTCTGCACT         | CTTCTACGCTCACCATCGTCT       | —                                |
| 45-2     | GTGCTCTCCGATTCTGCACT         | CTTCTACGCTCACCATCGTCT       | AAAACGAGACAAAGCTCACAC            |
| 46       | GTTACGGTTCCTCTCGTTGG         | GTCTGAGGATGAAACTGTCTGC      | GCTTGGCGTTTTAAATTACAG            |
| 47       | CCCTGTGGTTTCTGTTTCGT         | CTTCTACACGTCCCAATTG         | ACAGGGTAAGTTTCATTTC              |
| 48       | AGTACCGGTGCTTCGTGGTA         | CTGAGCCTCGTTGACGGAA         | GTCCGTTACACGAGAGATCG             |
| 49       | CTGACGAATCCGTCTCTGTC         | ATCAGCTTCAACACCCCAT         | ATATCTTTCTTATTGCTTTGG            |
| 50       | GAGGAAGAGGACGAGAAGGACT       | GCAGTCTCCCAATACCA           | AGAGCCAAAGAAAATTGCAGC            |
| 51       | GGATCGAATAGAATCCACGAGT       | CCTTCTCAGCTGTACCAGTATATCT   | —                                |
| 52       | GTCGGCAAAGGCTTCGAG           | GAGCATTCTCTGGCCAACCT        | CTCTCTGCGAGATTACAAA              |
| 53       | ACGAAGCAAACGAGCAG            | TGACCGGAGAGGAGGAAGAG        | CCTGAGAGAGATAACGTTTAT            |
| 54       | TGATTGGTGGGCTTGGCC           | AGCCACACAGCCTTAAGGGAC       | AAGGTTCTGTATTATTCCTC             |
| 55       | CCTTTTAGGTATATAAACTCTGACGA   | CTTCCCTTACTGCAGCTTCT        | AATTGTAGTTGCTGGTACC              |
| 56       | CCGGTAGATCGATCCAGTCA         | CTTCTGTGATGTGAGTACAC        | GTTAAGTGTGATAAAGCATA             |
| 57       | GCGTGTCTGACTCTTGAATC         | ATATCAACCTTACGAAATGGTTTA    | GTAACCTCTCGAAAGTTTGT             |
| 58       | CGGAATCTCTTCTCCGTTTCC        | TCACCTTGCACCTTTGCTA         | —                                |
| 59       | CCTAAAGAGCCTAGAATCCGCGA      | CCACCTTCTGGTCTTCTCCTCAAC    | CTGAAACCAAAGAGAAGCAAATTC         |
| 60       | GATAACCCAGGAAGGCTACT         | AGTCTCAAGAATCTCAGCATA       | GAAAGTCAGATTCTTTGATAG            |





**Table S4. Presence (yes) or absence (no) of AS events in the diploids *B. rapa* and *B. oleracea***

| Gene no. | <i>B. rapa</i> 1 | <i>B. rapa</i> 2 | <i>B. oleracea</i> 1 | <i>B. oleracea</i> 2 |
|----------|------------------|------------------|----------------------|----------------------|
| 1        | Yes              | Yes              | Yes                  | Yes                  |
| 2        | Yes              | Yes              | Yes                  | Yes                  |
| 3        | Yes              | Yes              | Yes                  | Yes                  |
| 4        | Yes              | Yes              | Yes                  | Yes                  |
| 5        | Yes              | Yes              | Yes                  | Yes                  |
| 6-1      | Yes              | Yes              | Yes                  | Yes                  |
| 6-2      | Yes              | Yes              | Yes                  | Yes                  |
| 7        | Yes              | Yes              | Yes                  | Yes                  |
| 8        | Yes              | Yes              | Yes                  | Yes                  |
| 9        | Yes              | Yes              | Yes                  | Yes                  |
| 10       | Yes              | Yes              | Yes                  | No                   |
| 11       | Yes              | Yes              | No                   | Yes                  |
| 12       | Yes              | Yes              | Yes                  | Yes                  |
| 13       | Yes              | Yes              | Yes                  | Yes                  |
| 14       | Yes              | Yes              | Yes                  | Yes                  |
| 15       | Yes              | Yes              | Yes                  | Yes                  |
| 16       | Yes              | Yes              | No                   | No                   |
| 17       | Yes              | Yes              | Yes                  | Yes                  |
| 18       | Yes              | Yes              | Yes                  | Yes                  |
| 19       | Yes              | Yes              | Yes                  | Yes                  |
| 20       | Yes              | Yes              | Yes                  | Yes                  |
| 21       | Yes              | Yes              | Yes                  | Yes                  |
| 22       | Yes              | Yes              | Yes                  | Yes                  |
| 23       | Yes              | Yes              | Yes                  | Yes                  |
| 24       | Yes              | Yes              | Yes                  | Yes                  |
| 25       | Yes              | Yes              | Yes                  | Yes                  |
| 26       | Yes              | Yes              | Yes                  | Yes                  |
| 27       | Yes              | Yes              | Yes                  | Yes                  |
| 28-1     | Yes              | Yes              | Yes                  | Yes                  |
| 28-2     | Yes              | Yes              | Yes                  | Yes                  |
| 29       | Yes              | Yes              | No                   | No                   |
| 30       | Yes              | Yes              | No                   | Yes                  |
| 31       | Yes              | Yes              | Yes                  | Yes                  |
| 32       | Yes              | Yes              | Yes                  | Yes                  |
| 33       | Yes              | Yes              | No                   | No                   |
| 34       | Yes              | Yes              | Yes                  | Yes                  |
| 35       | Yes              | Yes              | Yes                  | Yes                  |
| 36       | Yes              | Yes              | Yes                  | Yes                  |
| 37       | Yes              | Yes              | Yes                  | Yes                  |
| 38       | Yes              | Yes              | No                   | No                   |
| 39-1     | No               | No               | No                   | No                   |
| 39-2     | No               | No               | Yes                  | Yes                  |
| 40       | Yes              | Yes              | Yes                  | Yes                  |
| 41       | Yes              | Yes              | Yes                  | Yes                  |
| 42       | Yes              | Yes              | Yes                  | Yes                  |
| 43       | Yes              | Yes              | Yes                  | Yes                  |
| 44       | Yes              | Yes              | No                   | No                   |
| 45-1     | Yes              | Yes              | Yes                  | Yes                  |
| 45-2     | Yes              | Yes              | Yes                  | Yes                  |
| 46       | Yes              | Yes              | Yes                  | Yes                  |
| 47       | Yes              | Yes              | Yes                  | Yes                  |
| 48       | Yes              | Yes              | Yes                  | Yes                  |
| 49       | Yes              | Yes              | Yes                  | Yes                  |
| 50       | Yes              | Yes              | Yes                  | Yes                  |
| 51       | Yes              | Yes              | Yes                  | Yes                  |
| 52       | Yes              | Yes              | Yes                  | Yes                  |
| 53       | Yes              | Yes              | Yes                  | Yes                  |
| 54       | Yes              | Yes              | Yes                  | Yes                  |
| 55       | Yes              | Yes              | Yes                  | Yes                  |
| 56       | Yes              | Yes              | Yes                  | Yes                  |
| 57       | Yes              | Yes              | Yes                  | Yes                  |
| 58-1     | No               | No               | No                   | No                   |

**Table S4. Cont.**

| Gene no. | <i>B. rapa</i> 1 | <i>B. rapa</i> 2 | <i>B. oleracea</i> 1 | <i>B. oleracea</i> 2 |
|----------|------------------|------------------|----------------------|----------------------|
| 58-2     | No               | No               | No                   | No                   |
| 59       | Yes              | Yes              | Yes                  | Yes                  |
| 60       | Yes              | Yes              | Yes                  | Yes                  |
| 61       | Yes              | Yes              | Yes                  | Yes                  |
| 62-1     | Yes              | Yes              | Yes                  | Yes                  |
| 62-2     | Yes              | Yes              | Yes                  | Yes                  |
| 63       | Yes              | Yes              | Yes                  | Yes                  |
| 64-1     | Yes              | Yes              | Yes                  | Yes                  |
| 64-2     | Yes              | Yes              | Yes                  | Yes                  |
| 65       | Yes              | Yes              | No                   | No                   |
| 66       | Yes              | Yes              | Yes                  | Yes                  |
| 67-1     | Yes              | Yes              | Yes                  | Yes                  |
| 67-2     | Yes              | Yes              | Yes                  | Yes                  |
| 68       | Yes              | Yes              | Yes                  | Yes                  |
| 69       | No               | No               | Yes                  | Yes                  |
| 70       | Yes              | Yes              | Yes                  | Yes                  |
| 71       | Yes              | Yes              | Yes                  | Yes                  |
| 72       | Yes              | Yes              | Yes                  | Yes                  |
| 73       | Yes              | Yes              | Yes                  | Yes                  |
| 74       | Yes              | Yes              | Yes                  | Yes                  |

*B. rapa* 1 is Chinese cabbage cultivar MU525B; *B. rapa* 2 is a doubled-haploid line IMB218A that was a parent of the resynthesized allopolyploids (6); *B. oleracea* 1 is cauliflower cultivar semences; and *B. oleracea* 2 is a doubled-haploid line TO1000C that was a parent of the resynthesized allopolyploids (1).

1. Lukens LN, et al. (2006) Patterns of sequence loss and cytosine methylation within a population of newly resynthesized *Brassica napus* allopolyploids. *Plant Physiol* 140:336–348.

Table S5. Evolutionary conservation of AS events between species and between duplicated genes in *Brassica*

| Gene no. | <i>Brassica</i> gene accession no. | Conservation between <i>Brassica</i> and <i>Arabidopsis</i> | AS event found in another <i>Brassica</i> duplicate | AS event conserved among all four <i>B. rapa</i> and <i>B. oleracea</i> accessions |
|----------|------------------------------------|-------------------------------------------------------------|-----------------------------------------------------|------------------------------------------------------------------------------------|
| 1        | EX092731                           | —                                                           | No                                                  | Yes                                                                                |
| 2        | BZ430218                           | DP                                                          | n/a                                                 | Yes                                                                                |
| 3        | EX102573                           | —                                                           | No                                                  | Yes                                                                                |
| 4        | EX101076                           | —                                                           | No                                                  | Yes                                                                                |
| 5        | EE524832                           | SP                                                          | Yes                                                 | Yes                                                                                |
| 6-1      | EX091462                           | DP                                                          | No                                                  | Yes                                                                                |
| 6-2      | EV094871                           | DP                                                          | No                                                  | Yes                                                                                |
| 7        | EV101436                           | SP                                                          | No                                                  | Yes                                                                                |
| 8        | EE428842                           | SP                                                          | n/a                                                 | Yes                                                                                |
| 9        | EX094209                           | —                                                           | No                                                  | Yes                                                                                |
| 10       | EH416211                           | SP                                                          | No                                                  | No                                                                                 |
| 11       | EX044606                           | SP                                                          | No                                                  | No                                                                                 |
| 12       | ES967018                           | SP                                                          | n/a                                                 | Yes                                                                                |
| 13       | EX112955                           | SP                                                          | No                                                  | Yes                                                                                |
| 14       | EV117694                           | SP                                                          | No                                                  | Yes                                                                                |
| 15       | CX273025                           | DP                                                          | Yes                                                 | Yes                                                                                |
| 16       | EV040303                           | DP                                                          | No                                                  | No                                                                                 |
| 17       | GR439896                           | SP                                                          | No                                                  | Yes                                                                                |
| 18       | EE455614                           | SP                                                          | Yes                                                 | Yes                                                                                |
| 19       | EX118242                           | DP                                                          | No                                                  | Yes                                                                                |
| 20       | EX088617                           | SP                                                          | n/a                                                 | Yes                                                                                |
| 21       | EX087677                           | —                                                           | No                                                  | Yes                                                                                |
| 22       | EH425494                           | DP                                                          | n/a                                                 | Yes                                                                                |
| 23       | EV226178                           | DP                                                          | n/a                                                 | Yes                                                                                |
| 24       | DU830597                           | SP                                                          | No                                                  | Yes                                                                                |
| 25       | CX266395                           | DP                                                          | Yes                                                 | Yes                                                                                |
| 26       | CO750639                           | DP                                                          | Yes                                                 | Yes                                                                                |
| 27       | EV155331                           | SP                                                          | Yes                                                 | Yes                                                                                |
| 28-1     | EV194328                           | SP                                                          | No                                                  | Yes                                                                                |
| 28-2     | FG570383                           | DP                                                          | No                                                  | Yes                                                                                |
| 29       | EX027867                           | SP                                                          | n/a                                                 | No                                                                                 |
| 30       | DU833471                           | DP                                                          | n/a                                                 | No                                                                                 |
| 31       | EE411222                           | —                                                           | No                                                  | Yes                                                                                |
| 32       | CB686408                           | —                                                           | n/a                                                 | Yes                                                                                |
| 33       | EE517739                           | DP                                                          | n/a                                                 | No                                                                                 |
| 34       | DY005808                           | —                                                           | n/a                                                 | Yes                                                                                |
| 35       | EX118932                           | DP                                                          | No                                                  | Yes                                                                                |
| 36       | EX089805                           | —                                                           | No                                                  | Yes                                                                                |
| 37       | EV043623                           | DP                                                          | No                                                  | Yes                                                                                |
| 38       | EX093589                           | —                                                           | n/a                                                 | No                                                                                 |
| 39-1     | EX091499                           | DP                                                          | n/a                                                 | No                                                                                 |
| 39-2     | EX091499                           | SP                                                          | n/a                                                 | No                                                                                 |
| 40       | EV069552                           | —                                                           | No                                                  | Yes                                                                                |
| 41       | DN963102                           | —                                                           | No                                                  | Yes                                                                                |
| 42       | EV133401                           | SP                                                          | n/a                                                 | Yes                                                                                |
| 43       | CN736572                           | DP                                                          | n/a                                                 | Yes                                                                                |
| 44       | EX023963                           | —                                                           | No                                                  | No                                                                                 |
| 45-1     | EX090312                           | SP                                                          | n/a                                                 | Yes                                                                                |
| 45-2     | EX090312                           | SP                                                          | n/a                                                 | Yes                                                                                |
| 46       | CN830429                           | —                                                           | n/a                                                 | Yes                                                                                |
| 47       | EE454130                           | DP                                                          | n/a                                                 | Yes                                                                                |
| 48       | EV226263                           | SP                                                          | Yes                                                 | Yes                                                                                |
| 49       | EX093729                           | —                                                           | Yes                                                 | Yes                                                                                |
| 50       | FG553573                           | SP                                                          | Yes                                                 | Yes                                                                                |
| 51       | DY006239                           | DP                                                          | No                                                  | Yes                                                                                |
| 52       | ES932238                           | SP                                                          | No                                                  | Yes                                                                                |
| 53       | EX112152                           | SP                                                          | n/a                                                 | Yes                                                                                |
| 54       | EX091109                           | SP                                                          | Yes                                                 | Yes                                                                                |
| 55       | EV056008                           | DP                                                          | Yes                                                 | Yes                                                                                |
| 56       | EX087897                           | —                                                           | Yes                                                 | Yes                                                                                |
| 57       | CX281473                           | —                                                           | No                                                  | Yes                                                                                |
| 58-1     | EX087358                           | —                                                           | Yes                                                 | No                                                                                 |
